# Supplementary material for: Ciprofloxacin-Resistant Neisseria meningitidis, Delhi, India
Source: PubMed Central journal article supplement (PMC2851515; doi:10.3201/eid1310.060820), 2007-10
Supplement: 06-0820_appT-s1.pdf [file 06-0820_appT-s1.pdf]

Appendix Table. Antimicrobial susceptibility pattern of *Neisseria meningitidis* isolates from the outbreak during April–July 2005 Delhi, India\*

| Isolate    | MIC ( $\mu\text{g/mL}$ ) |      |        |       |       |       |       |       |       |      |      |      |       |      |       |      |     |
|------------|--------------------------|------|--------|-------|-------|-------|-------|-------|-------|------|------|------|-------|------|-------|------|-----|
|            | PEN                      | AMP  | CRO    | RIF   | CIP   | GAT   | MXF   | OFL   | NOR   | NAL  | ERY  | CLR  | AZM   | TEL  | TET   | MIN  | COT |
| SFDJ 723   | 0.06                     | 0.06 | <0.001 | 0.125 | 0.008 | 0.004 | 0.03  | 0.015 | 0.015 | 0.25 | 2    | 0.5  | 0.5   | 0.25 | 2     | 0.25 | 16  |
| SFDJ E-100 | 0.06                     | 0.06 | <0.001 | 0.125 | 0.25  | 0.125 | 0.25  | 0.5   | 0.5   | >16  | 2    | 0.5  | 0.5   | 0.25 | 2     | 0.25 | >16 |
| AP-II 420  | 0.06                     | 0.06 | <0.001 | 0.125 | 0.015 | 0.008 | 0.03  | 0.015 | 0.015 | 0.25 | 1    | 0.5  | 0.5   | 0.25 | 2     | 0.5  | >16 |
| IR-II 440  | 0.06                     | 0.06 | <0.001 | 0.06  | 0.25  | 0.125 | 0.25  | 0.5   | 0.5   | >16  | 2    | 0.5  | 0.5   | 0.25 | 2     | 0.25 | >16 |
| SFDJ 184   | 0.06                     | 0.06 | <0.001 | 0.125 | 0.25  | 0.125 | 0.25  | 0.5   | 0.5   | >16  | 2    | 0.5  | 0.5   | 0.5  | 4     | 0.25 | >16 |
| SFDJ 137   | 0.06                     | 0.06 | <0.001 | 0.125 | 0.25  | 0.125 | 0.25  | 0.5   | 0.5   | >16  | 2    | 0.5  | 1     | 0.25 | 4     | 0.25 | >16 |
| SFDJ E-79  | 0.06                     | 0.06 | <0.001 | 0.125 | 0.25  | 0.125 | 0.25  | 0.5   | 0.5   | >16  | 2    | 0.5  | 0.5   | 0.25 | 4     | 0.25 | >16 |
| SFDJ E-63  | 0.06                     | 0.06 | <0.001 | 0.125 | 0.25  | 0.125 | 0.25  | 0.5   | 0.5   | >16  | 2    | 0.5  | 0.5   | 0.25 | 4     | 0.25 | >16 |
| NICD 18    | 0.03                     | 0.06 | <0.001 | 0.125 | 0.25  | 0.125 | 0.25  | 0.5   | 0.5   | >16  | 2    | 0.5  | 0.5   | 0.25 | 4     | 0.25 | >16 |
| SFDJ E-95  | 0.06                     | 0.06 | <0.001 | 0.125 | 0.25  | 0.125 | 0.25  | 0.5   | 0.5   | >16  | 2    | 0.5  | 0.5   | 0.25 | 4     | 0.25 | >16 |
| SFDJ E-57  | 0.06                     | 0.06 | <0.001 | 0.125 | 0.25  | 0.125 | 0.25  | 0.5   | 0.5   | >16  | 2    | 0.5  | 0.5   | 0.25 | 4     | 0.25 | >16 |
| SFDJ E-11  | 0.06                     | 0.06 | <0.001 | 0.125 | 0.25  | 0.125 | 0.125 | 0.5   | 0.5   | >16  | 2    | 0.5  | 0.5   | 0.25 | 4     | 0.25 | >16 |
| IR-I 442   | 0.06                     | 0.06 | <0.001 | 0.125 | 0.25  | 0.125 | 0.125 | 0.5   | 0.5   | >16  | 2    | 0.5  | 0.5   | 0.25 | 4     | 0.25 | >16 |
| NICD 22    | 0.06                     | 0.06 | <0.001 | 0.125 | 0.25  | 0.125 | 0.25  | 0.5   | 0.5   | >16  | 2    | 0.5  | 0.5   | 0.25 | 2     | 0.25 | >16 |
| RRL-1      | 0.06                     | 0.06 | <0.001 | 0.008 | 0.008 | 0.004 | 0.03  | 0.015 | 0.03  | 0.25 | 0.5  | 0.06 | 0.125 | 0.06 | 0.125 | 0.06 | 1   |
| RRL-2      | 0.06                     | 0.06 | <0.001 | 0.004 | 0.008 | 0.008 | 0.06  | 0.015 | 0.008 | 0.25 | 0.25 | 0.06 | 0.125 | 0.06 | 0.125 | 0.06 | 1   |

\*PEN, penicillin; AMP, ampicillin; CRO, ceftriaxone; RIF, rifampin; CIP, ciprofloxacin; GAT, gatifloxacin; MXF, moxifloxacin; OFL, ofloxacin; NOR, norfloxacin; NAL, nalidixic acid; ERY, erythromycin; CLR, clarithromycin; AZM, azithromycin; TEL, telithromycin; TET, tetracycline; MIN, minocycline; COT, cotrimoxazole.
